# Supplementary figures and images for: Synthesis and biological activity of the (25R)-cholesten-26-oic acids—ligands for the hormonal receptor DAF-12 in Caenorhabditis elegans
Source: Royal Society of Chemistry journal article supplement (doi:10.1039/b817358c), 2009-01-01

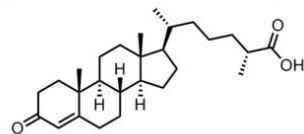

**1a** (25*R*)- $\Delta^4$ -Dafachronic acid

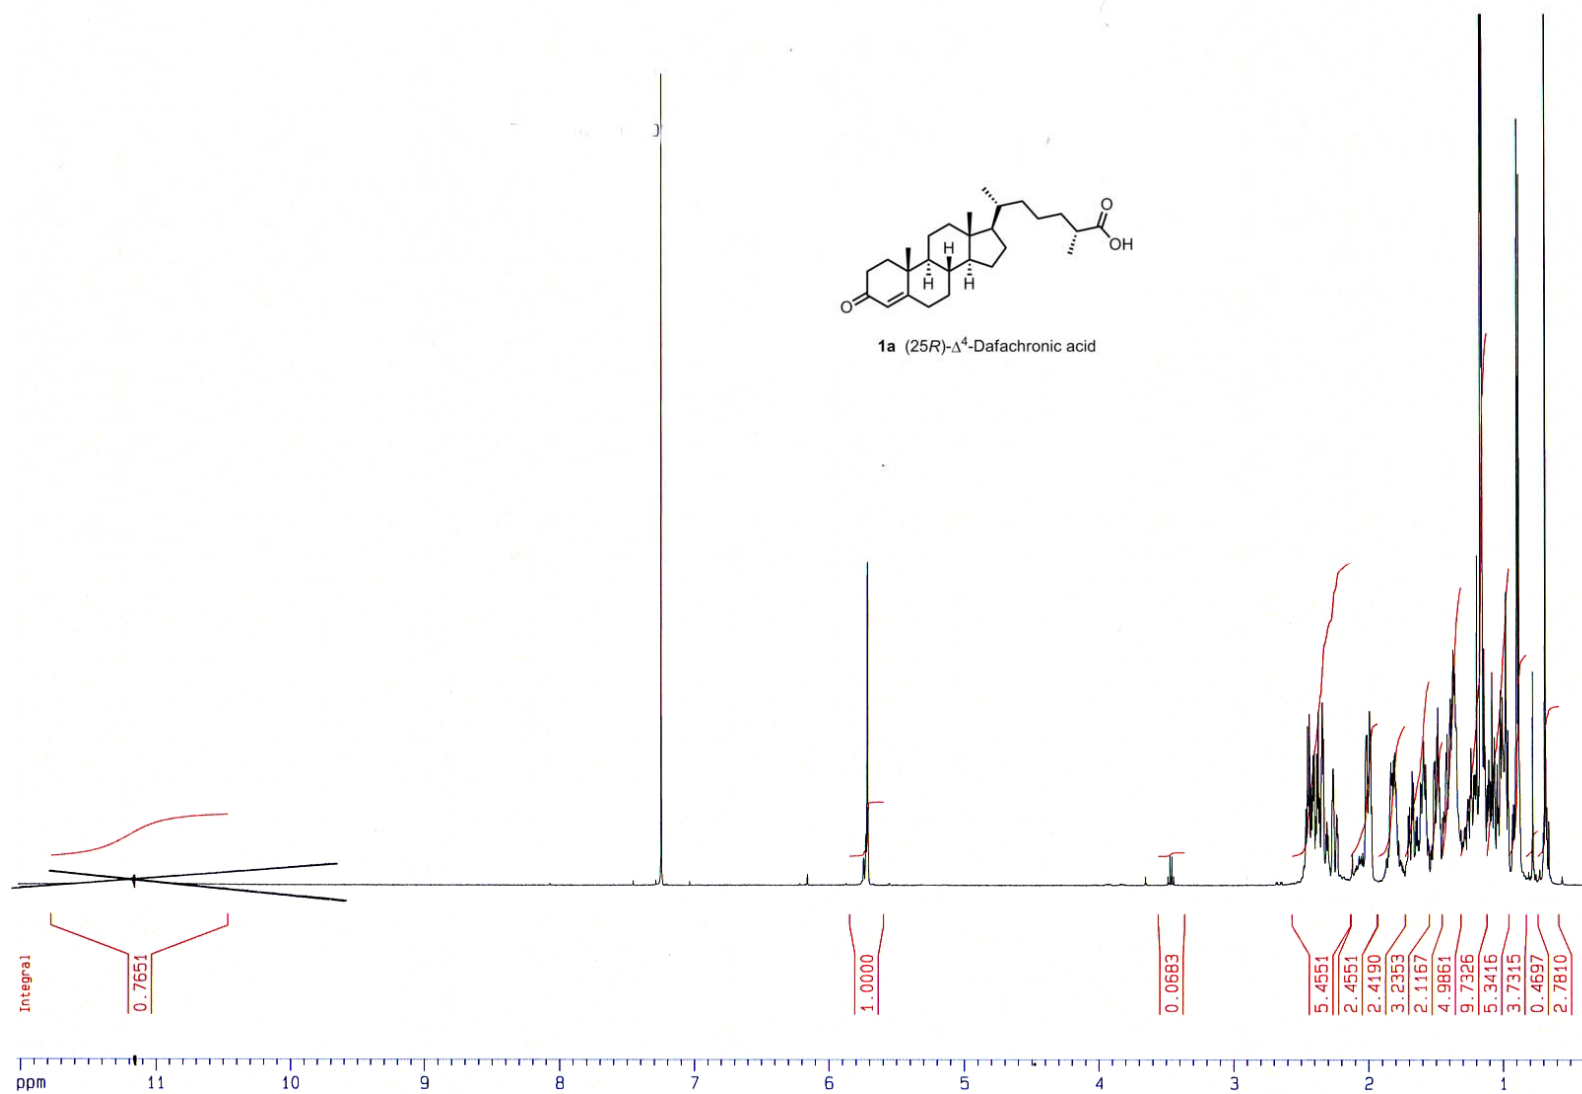

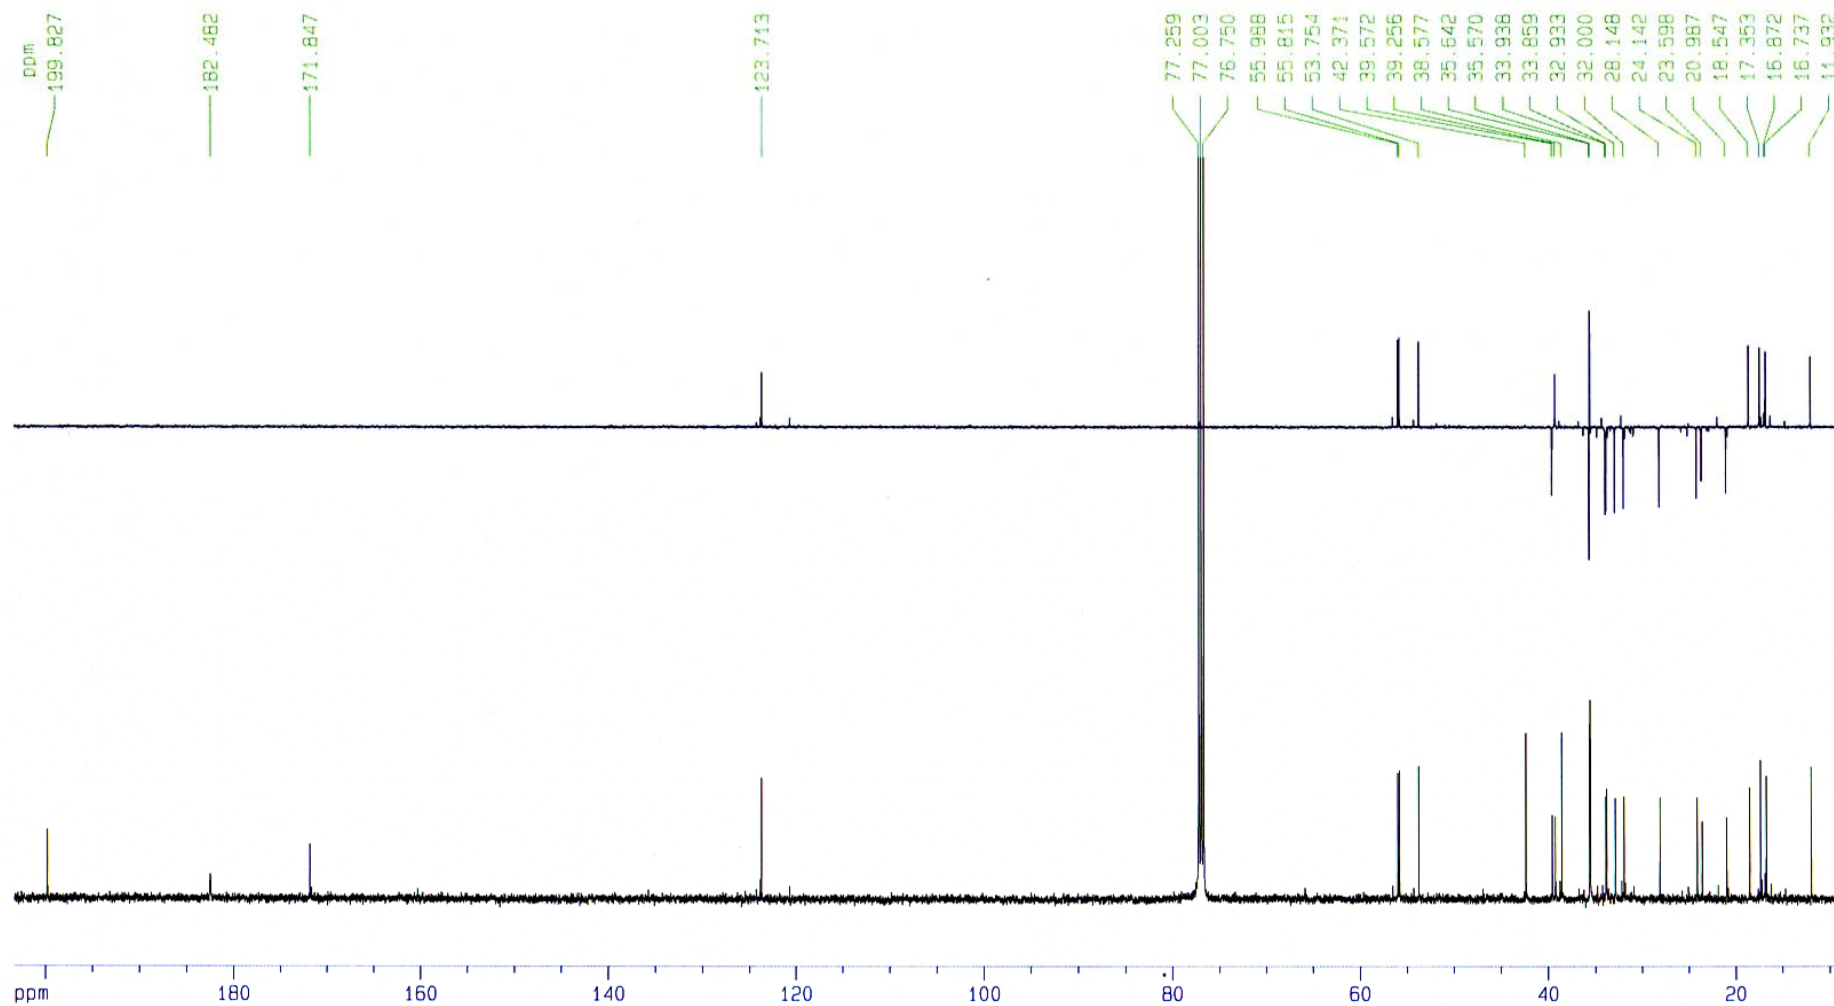

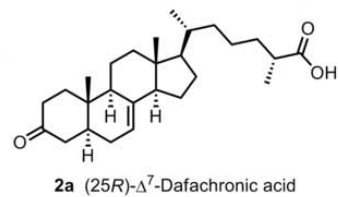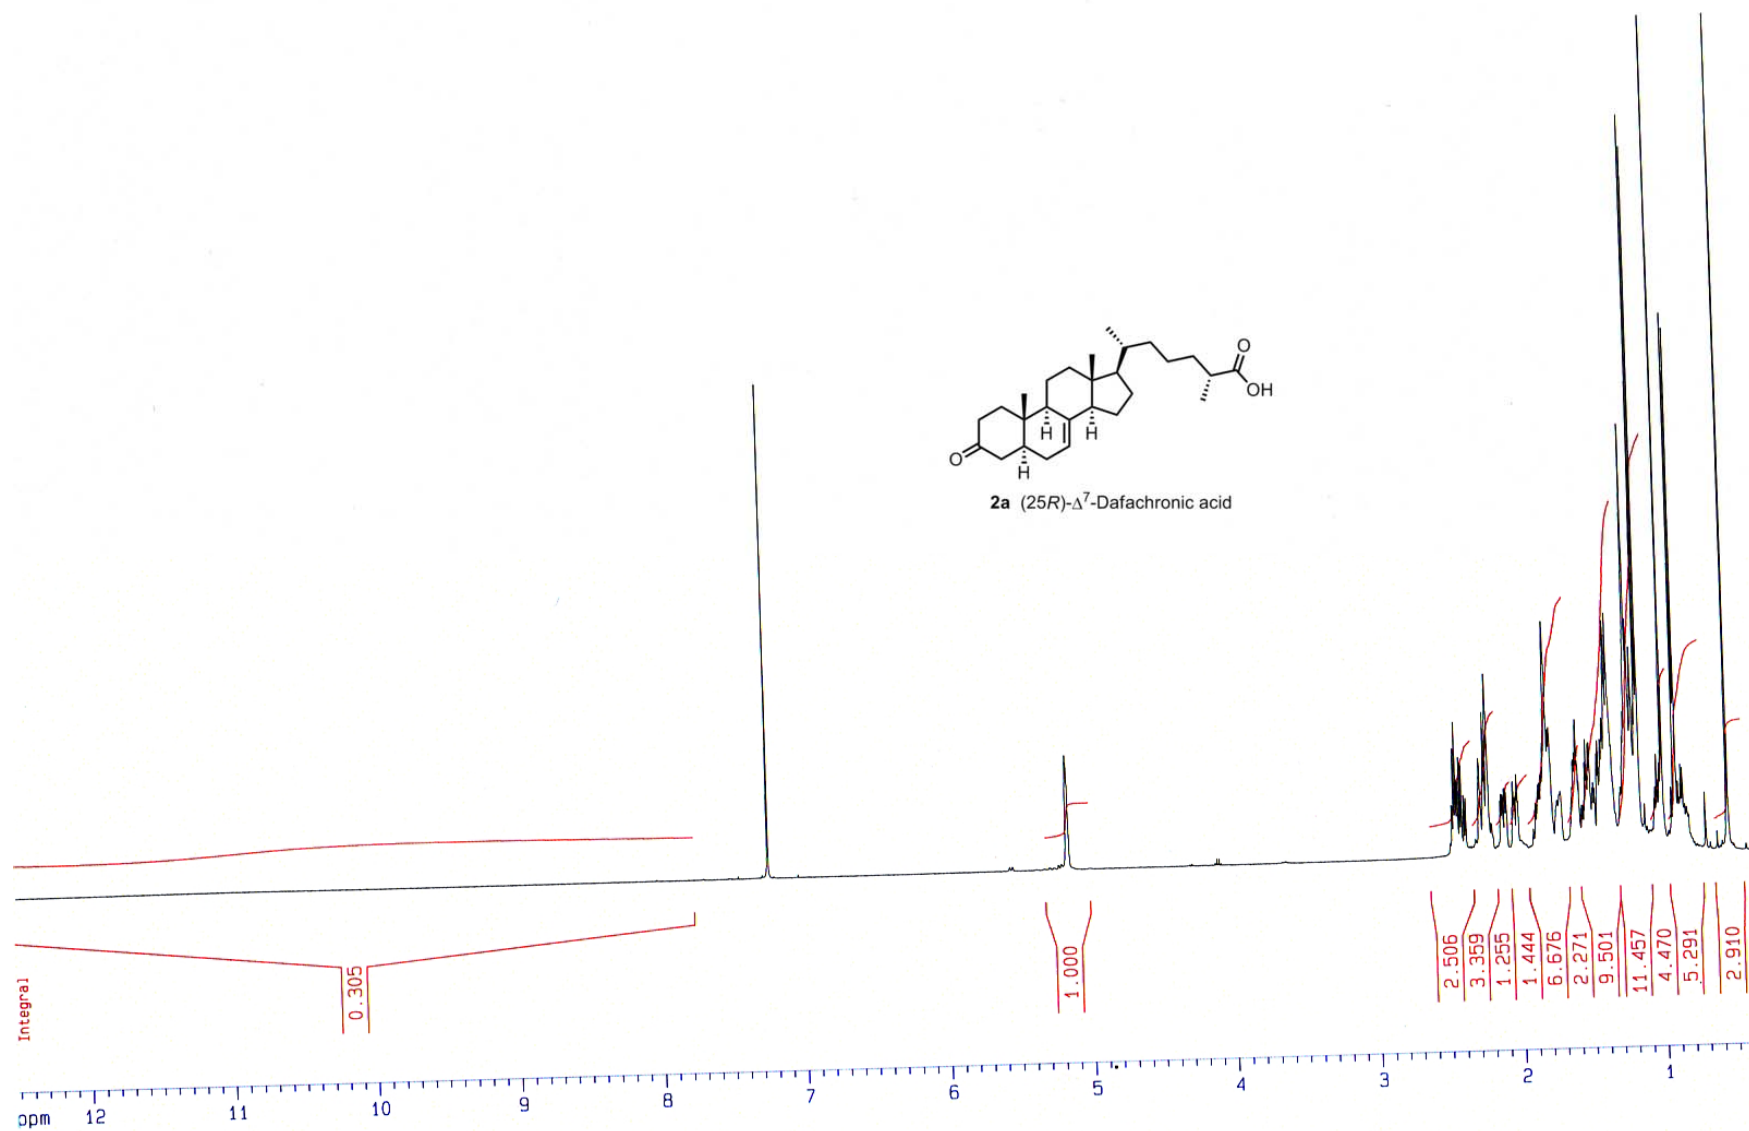

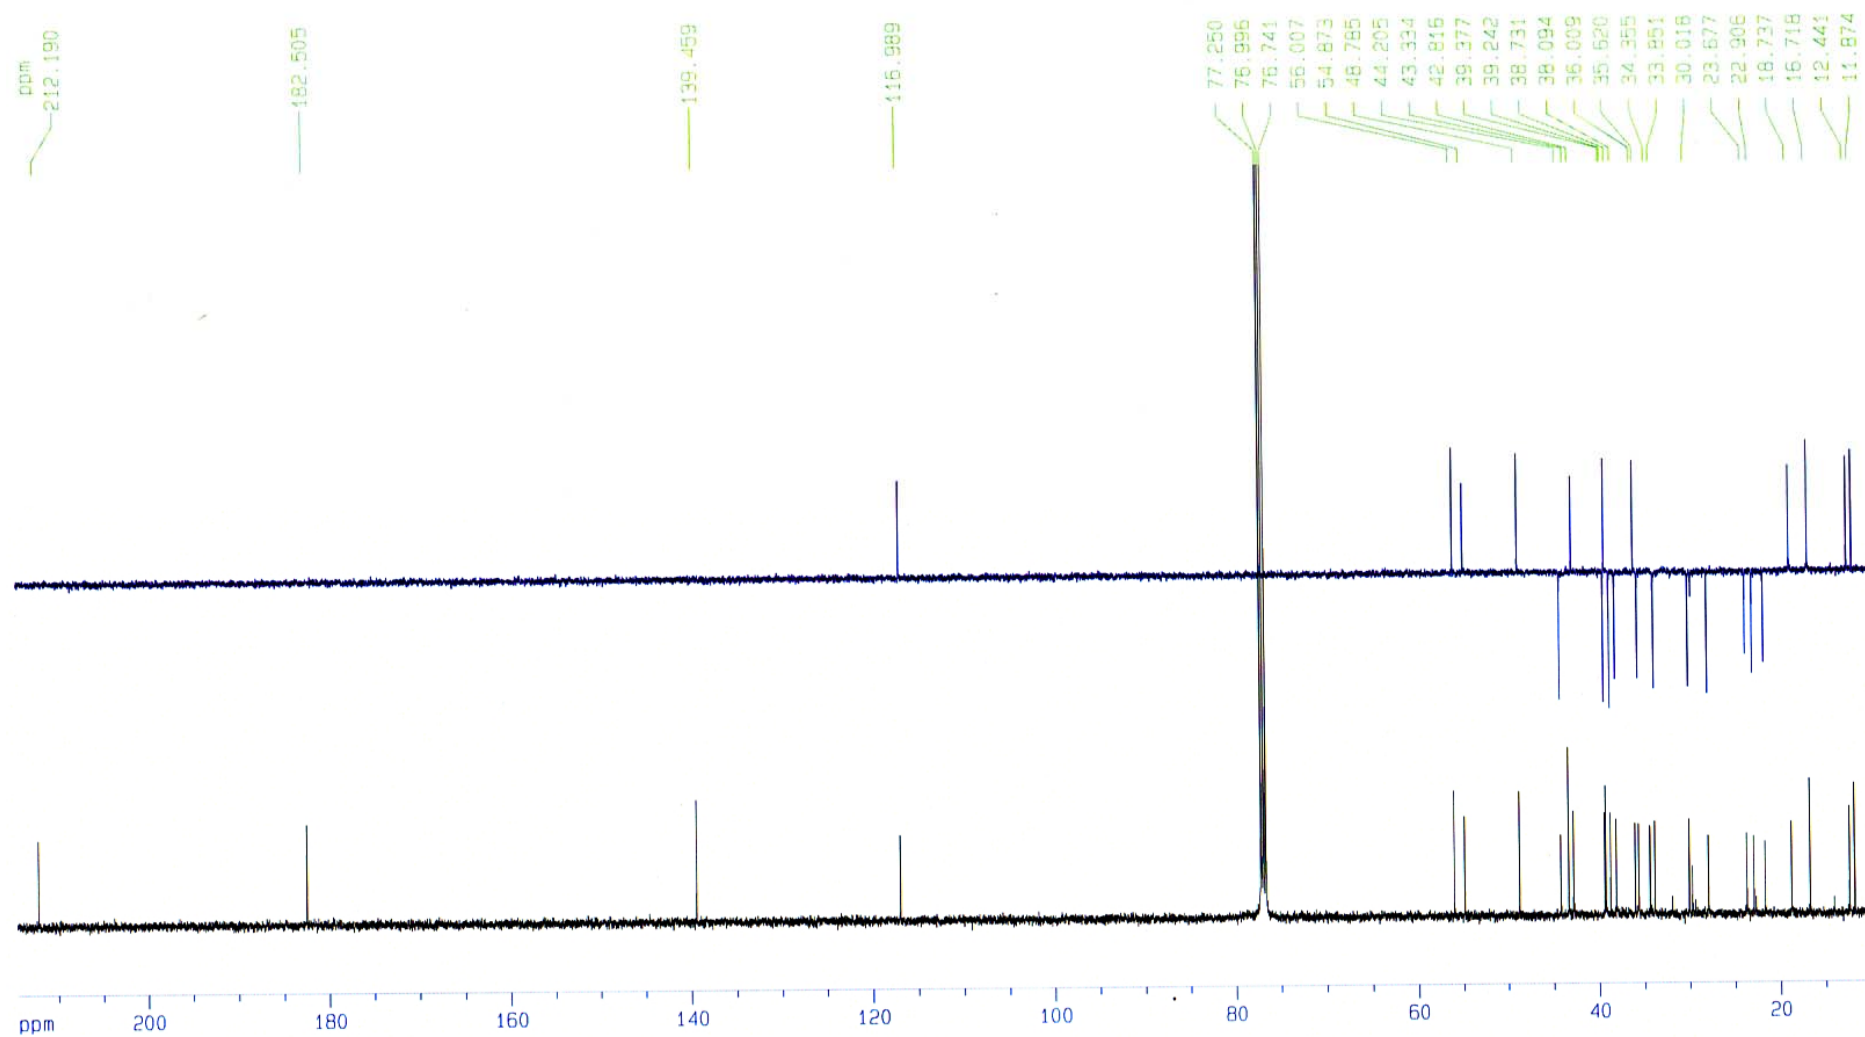

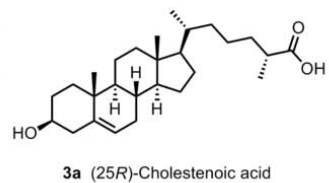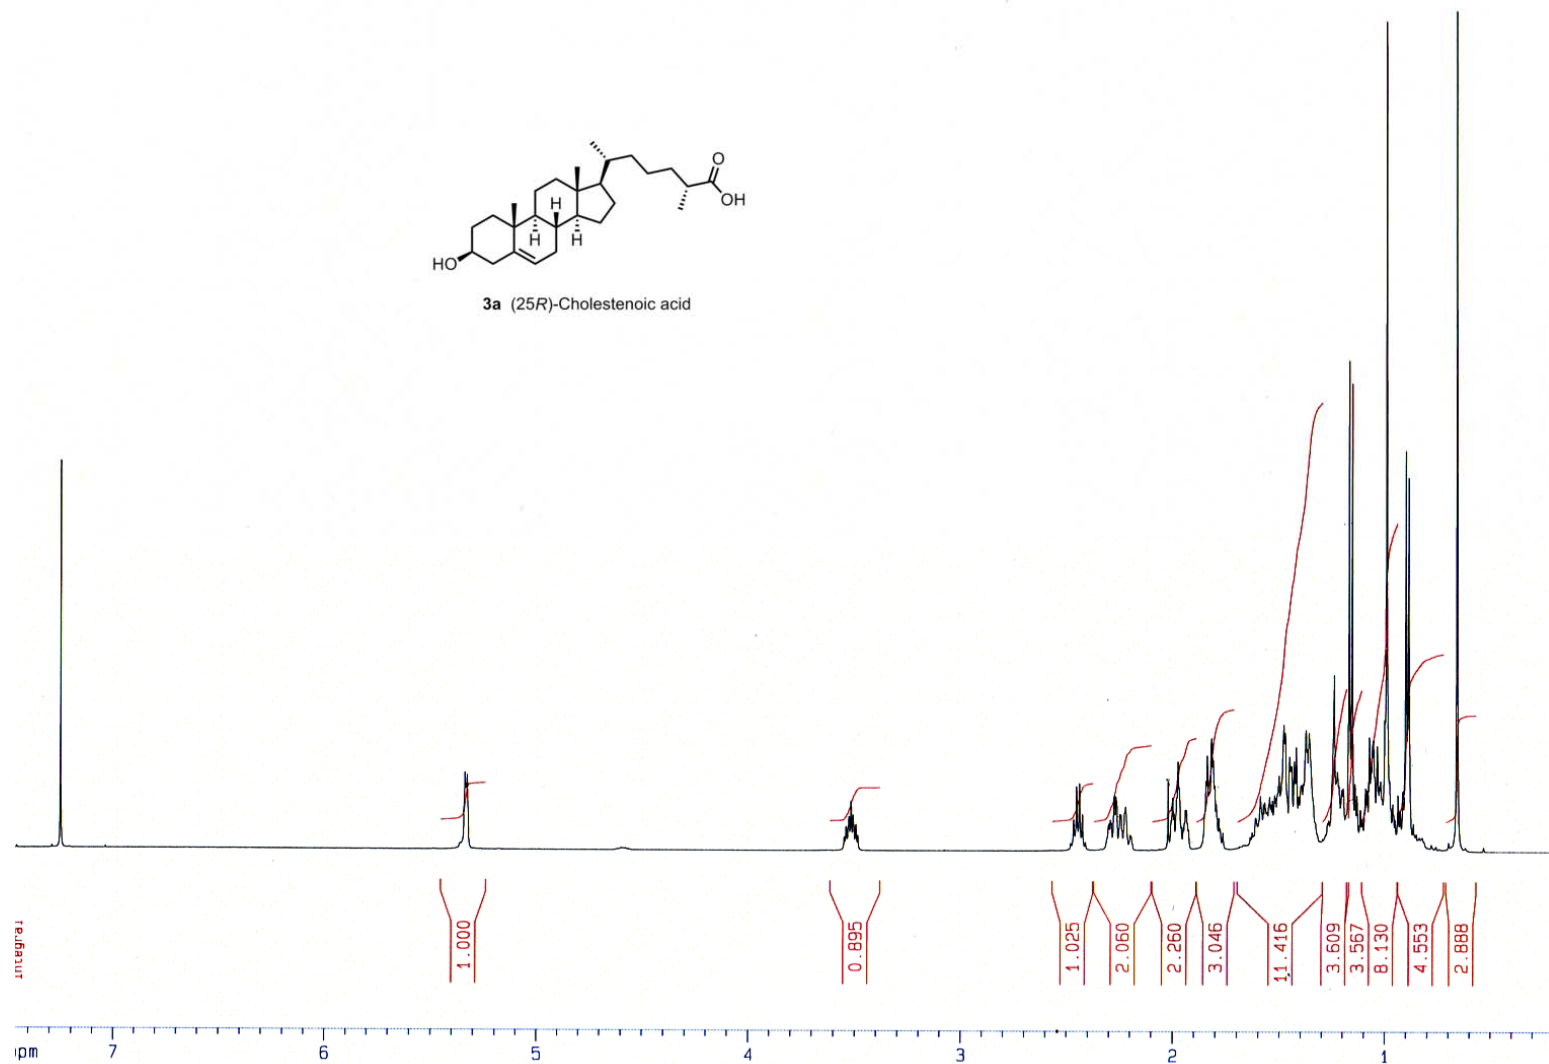

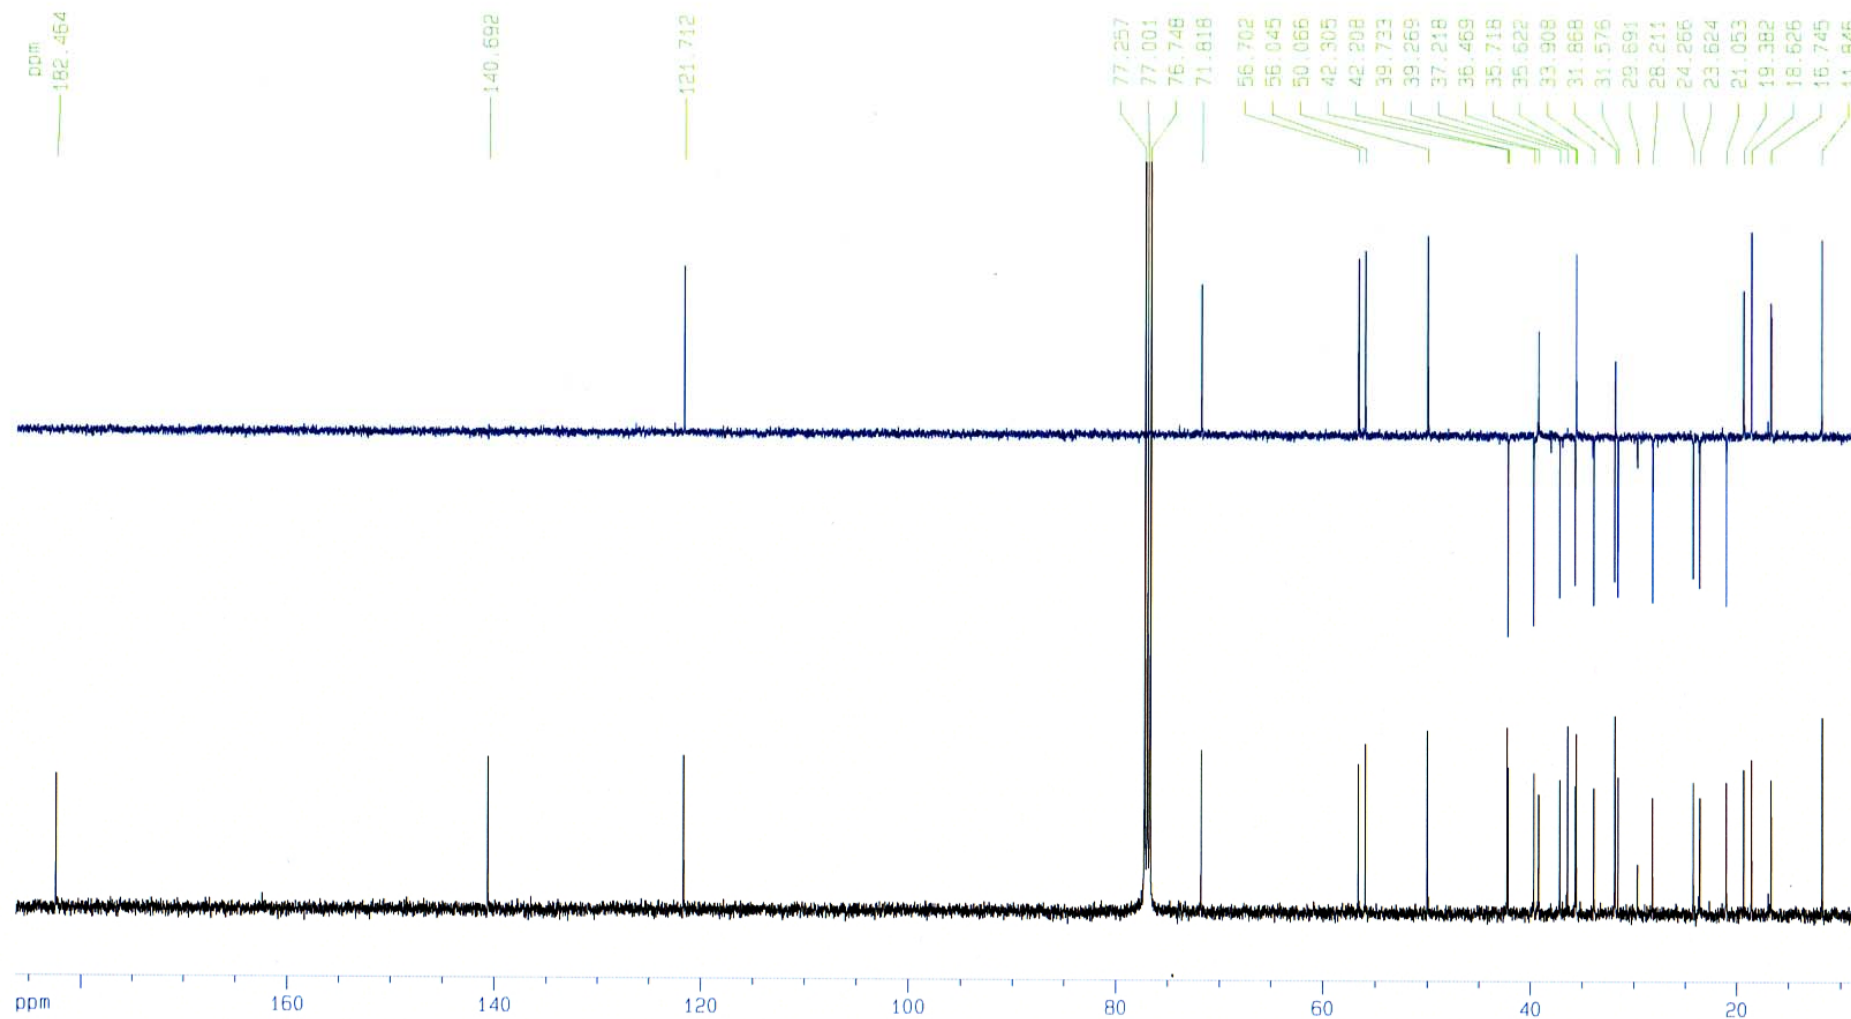

Supplement: b817358c.pdf [file b817358c.pdf]
